# Supplementary material
Source: PubMed Central journal article supplement (PMC10249954)
Supplement: NIHMS1894570-supplement-Supplementary_material.pdf [file NIHMS1894570-supplement-Supplementary_material.pdf]

## Supplemental Information

Atomistic simulations modify interpretation of spin-label oximetry data. Part 1: intensified water–lipid interfacial resistances

Gary Angles, Angela Hail, Rachel J. Dotson, and Sally C. Pias

*POPC*

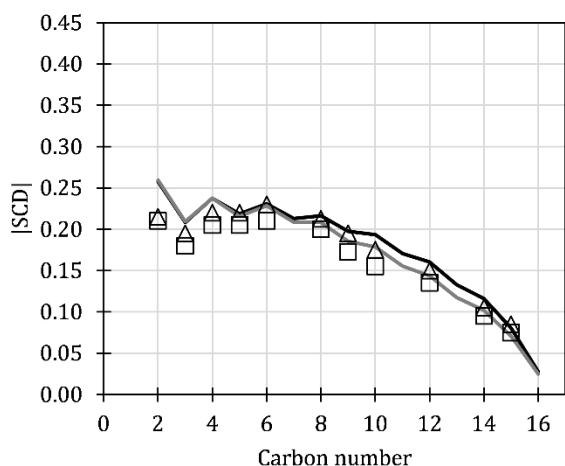

*POPC/Chol*

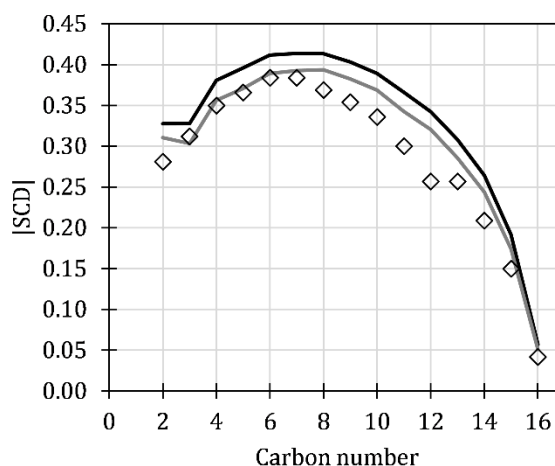

**SI Figure 1** Comparison of carbon-wise simulation and experimental order parameters,  $|S_{CD}|$ , for the *sn*-1 palmitoyl tail of POPC, in bilayers composed of POPC alone (*left*) or POPC/chol (*right*). Simulation order parameters shown for 298K (*black lines*) and for 308K (*gray lines*). Experimental order parameters shown for POPC at 293K [67] (*triangles*) and 300K [67] (*squares*) and for POPC/chol at 300K [69] (*diamonds*).

*298K*

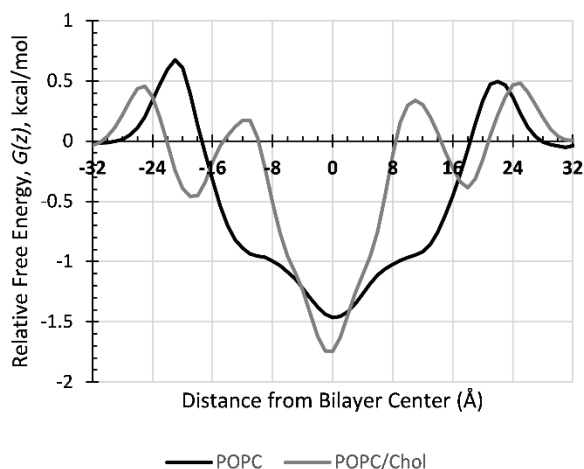

*308K*

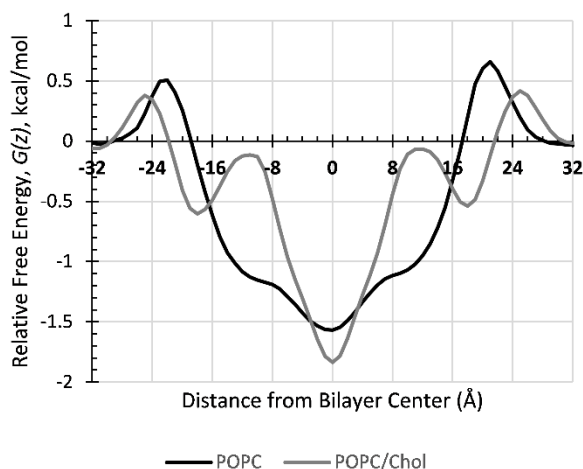

**SI Figure 2** Free energy profiles for POPC (*black lines*) and POPC/chol (*gray lines*) at 298K (*left*) and 308K (*right*).

298K

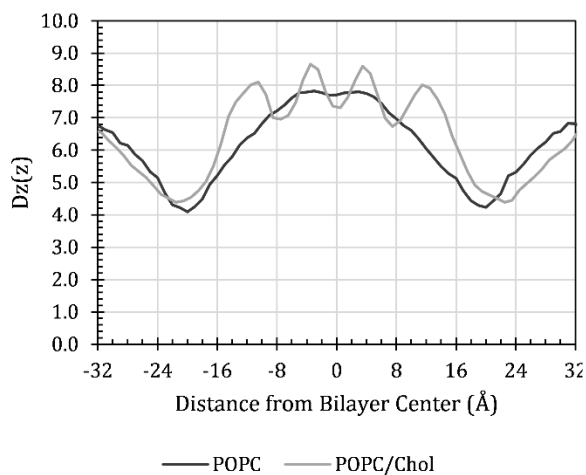

308K

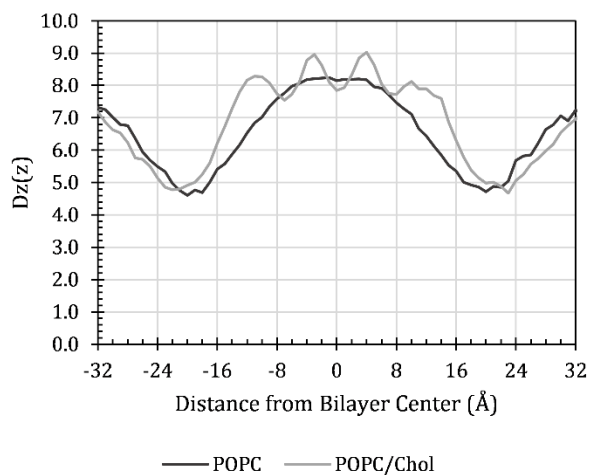

**SI Figure 3** Diffusion coefficient ( $D_z(z)$ ) profiles for POPC (*black lines*) and POPC/chol (*gray lines*) at 298K (*left*) and 308K (*right*).

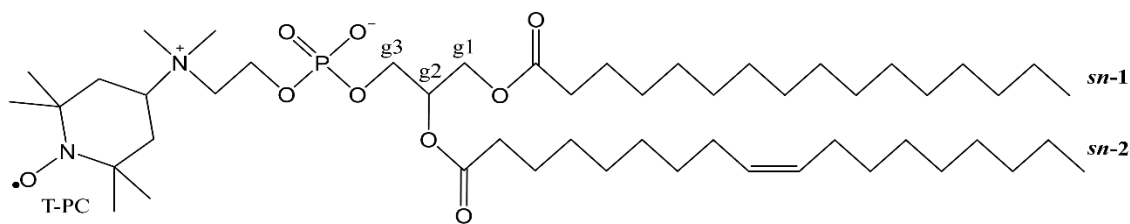

**SI Figure 4** Molecular structure of the modified POPC lipid used in EPR work to probe oxygen levels in the bilayer-water interfacial region, *via* the bulky and largely hydrophobic tempo-phosphocholine (T-PC) spin-label [38]
